# Supplementary material for: Competing Metal–Ligand Interactions in Tris(cyclopentadienyl)-cyclohexylisonitrile Complexes of Trivalent Actinides and Lanthanides
Source: MDPI journal article supplement (doi:10.3390/molecules27123811), 2022-06-14
Supplement: s1 [file s1]

## Supplementary Material

### Competing Metal–Ligand Interactions in Tris(cyclopentadienyl)-cyclohexylisonitrile Complexes of Trivalent Actinides and Lanthanides

#### List of Content:

Table S1. Crystallographic details for all complexes and selected XRD results on the  $(\text{Cp})_3\text{La}(\text{C}\equiv\text{NCy})^*(\text{Cp})_3\text{La}(\text{C}\equiv\text{NCy})_2$  sample.

Table S2. Selected computed data: the spinmultiplicities (m) used in the open-shell calculations, geometrical parameters ( $\text{\AA}$ ) and  $\text{C}\equiv\text{N}$  stretching frequencies ( $\text{C}\equiv\text{N}$ ,  $\text{cm}^{-1}$ ).

Table S3. Table S3. Selected QTAIM data (au) of  $(\text{Cp})_3\text{M}(\text{C}\equiv\text{NCy})$  complexes.

Table S4. Selected QTAIM data (au) of  $\text{M}(\text{Cp})_3$  complexes.

Figure S1.  $^1\text{H}$  NMR spectrum of  $(\text{Cp})_3\text{Pu}(\text{C}\equiv\text{NCy})$  measured in  $\text{C}_6\text{D}_6$ .

Figure S2.  $^1\text{H}$  NMR spectrum of  $(\text{Cp})_3\text{Pu}(\text{C}\equiv\text{NCy})$  in the range from 0.7 to -0.45 ppm.

Figure S3. 2D HH correlation NMR spectrum of  $(\text{Cp})_3\text{Pu}(\text{C}\equiv\text{NCy})$  in the range from 3.6 to -0.57 ppm.

Cartesian coordinates of the optimized structures of  $(\text{Cp})_3\text{M}(\text{C}\equiv\text{NCy})$  (M = La Tb, Lu, U, Np, Pu) and  $(\text{Cp})_3\text{La}(\text{C}\equiv\text{NCy})_2$

**Table S1.** Crystallographic details for the complexes [(Cp)<sub>3</sub>M(CNCy)]

| Compound                             | La                                           | Ce                                           | Nd                                           | Sm                                           | Eu                                           | Gd                                           |
|--------------------------------------|----------------------------------------------|----------------------------------------------|----------------------------------------------|----------------------------------------------|----------------------------------------------|----------------------------------------------|
| Formula                              | C <sub>22</sub> H <sub>26</sub> NLa          | C <sub>22</sub> H <sub>26</sub> NCe          | C <sub>22</sub> H <sub>26</sub> NNd          | C <sub>22</sub> H <sub>26</sub> NSm          | C <sub>22</sub> H <sub>26</sub> NEu          | C <sub>22</sub> H <sub>26</sub> NGd          |
| CCDC No.                             | 2171158                                      | 2171161                                      |                                              | 2171159                                      | 2171165                                      | 2171166                                      |
| Formula weight / g/mol               | 443.34                                       | 444.56                                       | 448.68                                       | 454.79                                       | 456.40                                       | 461.69                                       |
| T / K                                | 173                                          | 123                                          | 103                                          | 103                                          | 123                                          | 123                                          |
| Crystal system                       | triclinic                                    | monoclinic                                   | monoclinic                                   | monoclinic                                   | monoclinic                                   | monoclinic                                   |
| Space group (no)                     | P-1 (2)                                      | C2/c (15)                                    | P2 <sub>1</sub> /n (14)                      |
| Z                                    | 4                                            | 8                                            | 4                                            | 4                                            | 4                                            | 4                                            |
| Unit cell parameter                  |                                              |                                              |                                              |                                              |                                              |                                              |
| a / Å                                | 8.3671(14)                                   | 24.193(16)                                   | 8.2644(4)                                    | 8.2017(5)                                    | 8.1917(9)                                    | 8.1892(4)                                    |
| b / Å                                | 11.642(2)                                    | 8.166(5)                                     | 20.530(1)                                    | 20.205(1)                                    | 20.483(2)                                    | 20.4984(9)                                   |
| c / Å                                | 21.645(4)                                    | 22.920(15)                                   | 12.2666(7)                                   | 12.1592(7)                                   | 12.258(1)                                    | 12.2452(6)                                   |
| α / °                                | 91.030(2)                                    |                                              |                                              |                                              |                                              |                                              |
| β / °                                | 90.243(2)                                    | 119.399(15)                                  | 105.012(1)                                   | 103.522(1)                                   | 104.981(1)                                   | 105.192(1)                                   |
| γ / °                                | 104.259(2)                                   |                                              |                                              |                                              |                                              |                                              |
| Volume / Å <sup>3</sup>              | 2043.0(6)                                    | 3945(4)                                      | 2010.3(2)                                    | 1959.1(2)                                    | 1986.8(4)                                    | 1983.7(2)                                    |
| Density (calc.) / g/cm <sup>-3</sup> | 1.441                                        | 1.497                                        | 1.482                                        | 1.542                                        | 1.526                                        | 1.546                                        |
| Abs. coeff. / mm <sup>-1</sup>       | 2.093                                        | 2.310                                        | 2.584                                        | 2.999                                        | 3.159                                        | 3.345                                        |
| F(000)                               | 888                                          | 1784                                         | 900                                          | 908                                          | 912                                          | 916                                          |
| Crystal size / mm                    | 0.25<br>0.35<br>0.35                         | 0.108<br>0.077<br>0.022                      | 0.044<br>0.093<br>0.161                      | 0.167<br>0.111<br>0.054                      | 0.132<br>0.064<br>0.056                      | 0.091<br>0.083<br>0.061                      |
| θ range / °                          | 1.805 to<br>28.379                           | 1.932 to<br>28.354                           | 1.984 to<br>26.726                           | 1.996 to<br>28.504                           | 1.987 to<br>28.459                           | 1.987 to<br>27.425                           |
| Index ranges                         | -11 ≤ h ≤ 10<br>-15 ≤ k ≤ 15<br>-28 ≤ l ≤ 28 | -32 ≤ h ≤ 32<br>-10 ≤ k ≤ 10<br>-29 ≤ l ≤ 29 | -10 ≤ h ≤ 10<br>-25 ≤ k ≤ 25<br>-15 ≤ l ≤ 15 | -11 ≤ h ≤ 11<br>-27 ≤ k ≤ 26<br>-16 ≤ l ≤ 16 | -10 ≤ h ≤ 10<br>-26 ≤ k ≤ 26<br>-16 ≤ l ≤ 16 | -10 ≤ h ≤ 10<br>-26 ≤ k ≤ 26<br>-15 ≤ l ≤ 15 |
| Reflections                          |                                              |                                              |                                              |                                              |                                              |                                              |
| collected                            | 24596                                        | 20274                                        | 34907                                        | 35639                                        | 27843                                        | 35344                                        |
| independent                          | 9797                                         | 4262                                         | 4264                                         | 4681                                         | 4602                                         | 4516                                         |
| R(int)                               | 0.0512                                       | 0.1848                                       | 0.0272                                       | 0.0260                                       | 0.0866                                       | 0.0300                                       |
| obs. (I>2σ)                          | 7165                                         | 3601                                         | 3816                                         | 4317                                         | 3459                                         | 3954                                         |
| Coverage / % (θ=25°)                 | 99.8                                         | 94.7                                         | 99.9                                         | 100                                          | 99.3                                         | 100                                          |
| Data/restraints/param.               | 9797/0/516                                   | 4262/222/298                                 | 4264/0/220                                   | 4681/0/220                                   | 4602/0/221                                   | 4516/0/221                                   |
| Goof on F <sup>2</sup>               | 1.141                                        | 0.968                                        | 1.527                                        | 1.042                                        | 1.191                                        | 0.991                                        |
| R1 [I>2σ(I)]                         | 0.0716                                       | 0.0644                                       | 0.0174                                       | 0.0159                                       | 0.0346                                       | 0.0164                                       |
| wR2 (all data)                       | 0.1526                                       | 0.1697                                       | 0.0351                                       | 0.0508                                       | 0.0684                                       | 0.0335                                       |
| Largest peak/hole / eÅ <sup>-3</sup> | 1.892/-<br>2.034                             | 1.633/-1.022                                 | 0.283/-<br>0.322                             | 0.491/-<br>0.424                             | 1.446/-<br>0.695                             | 0.290/-<br>0.300                             |

Standard deviation in parentheses.

Table 1 continued:

| Compound                             | Tb                                           | Dy                                           | Ho                                           | Er                                           | Tm                                           | Yb                                           |
|--------------------------------------|----------------------------------------------|----------------------------------------------|----------------------------------------------|----------------------------------------------|----------------------------------------------|----------------------------------------------|
| Formula                              | C <sub>22</sub> H <sub>26</sub> NTb          | C <sub>22</sub> H <sub>26</sub> NDy          | C <sub>22</sub> H <sub>26</sub> NHo          | C <sub>22</sub> H <sub>26</sub> NEr          | C <sub>22</sub> H <sub>26</sub> NTm          | C <sub>22</sub> H <sub>26</sub> NTm          |
| CCDC No.                             | 2171169                                      | 2171164                                      | 2171160                                      | 2171157                                      | 2171162                                      | 2171156                                      |
| Formula weight / g/mol               | 463.36                                       | 466.94                                       | 469.37                                       | 471.70                                       | 473.37                                       | 477.48                                       |
| T / K                                | 123                                          | 123                                          | 203                                          | 103                                          | 123                                          | 203                                          |
| Crystal system                       | monoclinic                                   | monoclinic                                   | monoclinic                                   | monoclinic                                   | monoclinic                                   | monoclinic                                   |
| Space group                          | P2 <sub>1</sub> /n (14)                      |
| Z                                    | 4                                            | 4                                            | 4                                            | 4                                            | 4                                            | 4                                            |
| Unit cell parameter                  |                                              |                                              |                                              |                                              |                                              |                                              |
| a / Å                                | 8.141(1)                                     | 8.1284(4)                                    | 8.1320(5)                                    | 8.1001(6)                                    | 8.0821(4)                                    | 8.0959(5)                                    |
| b / Å                                | 20.212(2)                                    | 20.214(1)                                    | 20.477(1)                                    | 20.209(1)                                    | 20.215(1)                                    | 20.427(1)                                    |
| c / Å                                | 12.132(1)                                    | 12.1301(6)                                   | 12.2175(7)                                   | 12.1052(9)                                   | 12.1022(6)                                   | 12.1800(5)                                   |
| β / °                                | 103.936(1)                                   | 103.966(1)                                   | 105.230(1)                                   | 104.082(1)                                   | 104.273(1)                                   | 105.412(1)                                   |
| Volume / Å <sup>3</sup>              | 1937.8(4)                                    | 1934.2(2)                                    | 1963.0(2)                                    | 1922.0(2)                                    | 1916.2(2)                                    | 1949.1(2)                                    |
| Density (calc.) / g/cm <sup>-3</sup> | 1.588                                        | 1.604                                        | 1.588                                        | 1.630                                        | 1.641                                        | 1.627                                        |
| Abs. coeff. / mm <sup>-1</sup>       | 3.651                                        | 3.865                                        | 4.032                                        | 4.368                                        | 4.632                                        | 4.800                                        |
| F(000)                               | 920                                          | 924                                          | 928                                          | 932                                          | 936                                          | 940                                          |
| Crystal size / mm                    | 0.081<br>0.077<br>0.057                      | 0.075<br>0.064<br>0.048                      | 0.154<br>0.124<br>0.084                      | 0.045<br>0.048<br>0.202                      | 0.114<br>0.088<br>0.068                      | 0.45<br>0.40<br>0.40                         |
| θ range / °                          | 2.002 to<br>28.310                           | 2.002 to<br>27.884                           | 1.989 to<br>28.557                           | 2.006 to<br>28.520                           | 2.007 to<br>28.470                           | 1.994 to<br>29.294                           |
| Index ranges                         | -10 ≤ h ≤ 10<br>-26 ≤ k ≤ 26<br>-15 ≤ l ≤ 16 | -10 ≤ h ≤ 10<br>-25 ≤ k ≤ 25<br>-15 ≤ l ≤ 15 | -10 ≤ h ≤ 10<br>-27 ≤ k ≤ 26<br>-16 ≤ l ≤ 16 | -10 ≤ h ≤ 10<br>-26 ≤ k ≤ 26<br>-15 ≤ l ≤ 16 | -10 ≤ h ≤ 10<br>-25 ≤ k ≤ 25<br>-15 ≤ l ≤ 16 | -10 ≤ h ≤ 10<br>-26 ≤ k ≤ 26<br>-16 ≤ l ≤ 16 |
| Reflections                          |                                              |                                              |                                              |                                              |                                              |                                              |
| collected                            | 33304                                        | 34827                                        | 35840                                        | 34633                                        | 31181                                        | 22856                                        |
| independent                          | 4573                                         | 4517                                         | 4713                                         | 4602                                         | 4521                                         | 4763                                         |
| R(int)                               | 0.0456                                       | 0.0251                                       | 0.0194                                       | 0.0220                                       | 0.0246                                       | 0.0291                                       |
| obs. (I>2σ)                          | 3856                                         | 4073                                         | 4361                                         | 4222                                         | 4133                                         | 4215                                         |
| Coverage / % (θ=25°)                 | 100                                          | 100                                          | 100                                          | 100                                          | 100                                          | 100                                          |
| Data/restraints/param.               | 4573/0/221                                   | 4517/0/221                                   | 4713/0/221                                   | 4602/0/220                                   | 4521/0/221                                   | 4763/0/220                                   |
| Goof on F <sup>2</sup>               | 1.176                                        | 1.131                                        | 1.095                                        | 1.000                                        | 1.103                                        | 1.120                                        |
| R1 [I>2σ(I)]                         | 0.0229                                       | 0.0144                                       | 0.0144                                       | 0.0132                                       | 0.0145                                       | 0.0192                                       |
| wR2 (all data)                       | 0.0423                                       | 0.0316                                       | 0.0318                                       | 0.0310                                       | 0.0312                                       | 0.0389                                       |
| Largest peak/hole/eÅ <sup>-3</sup>   | 0.643/-<br>0.905                             | 0.579/-<br>0.407                             | 0.34/-0.455                                  | 0.44/-0.509                                  | 0.53/-0.492                                  | 0.412/-<br>0.473                             |

Table 1 1: continued

| Compound                             | Lu                                           | Pu <sup>a</sup>                             | (Cp) <sub>3</sub> La(C≡NCy) <sub>2</sub>          | (Cp) <sub>3</sub> La(C≡NCy) <sup>+</sup><br>(Cp) <sub>3</sub> La(C≡NCy) <sub>2</sub> |
|--------------------------------------|----------------------------------------------|---------------------------------------------|---------------------------------------------------|--------------------------------------------------------------------------------------|
| Formula                              | C <sub>22</sub> H <sub>26</sub> NLu          | C <sub>22</sub> H <sub>26</sub> NPu         | C <sub>29</sub> H <sub>37</sub> N <sub>2</sub> La | C <sub>51</sub> H <sub>63</sub> N <sub>3</sub> La                                    |
| CCDC No.                             | 2171168                                      | 2171170                                     | 2171167                                           | 2171162                                                                              |
| Formula weight /<br>g/mol            | 479.41                                       | 546.44                                      | 557.26                                            | 995.86                                                                               |
| T / K                                | 170                                          | 100(2)                                      | 173                                               | 173                                                                                  |
| Crystal system                       | monoclinic                                   | monoclinic                                  | monoclinic                                        | monoclinic                                                                           |
| Space group (no)                     | P2 <sub>1</sub> /n (14)                      | P2 <sub>1</sub> /n (14)                     | C2/c (15)                                         | P2 <sub>1</sub> /n (14)                                                              |
| Z                                    | 4                                            | 4                                           | 16                                                | 4                                                                                    |
| Unit cell parameter<br>a / Å         | 8.0799(3)                                    | 8.2028(16)                                  | 15.8758(14)                                       | 15.0815(16)                                                                          |
| b / Å                                | 20.476(1)                                    | 20.700(4)                                   | 21.5600(19)                                       | 19.102(2)                                                                            |
| c / Å                                | 12.1948(8)                                   | 12.189(2)                                   | 31.189(3)                                         | 16.6006(18)                                                                          |
| β / °                                | 104.873(1)                                   | 109.81(3)                                   | 97.634(1)                                         | 96.655(2)                                                                            |
| Volume / Å <sup>3</sup>              | 1952.6(1)                                    | 1947.1(8)                                   | 10581(2)                                          | 4750(1)                                                                              |
| Density (calc.) / g/cm <sup>-3</sup> | 1.639                                        | 1.864                                       | 1.387                                             | 1.393                                                                                |
| Abs. coeff. / mm <sup>-1</sup>       | 5.084                                        | 3.387                                       | 1.632                                             | 1.809                                                                                |
| F(000)                               | 944                                          | 1036                                        | 4508                                              | 2016                                                                                 |
| Crystal size / mm                    | 0.133<br>0.128<br>0.108                      | 0.050<br>0.035<br>0.015                     | 0.30<br>0.40<br>0.45                              | 0.25<br>0.35<br>0.40                                                                 |
| θ range / °                          | 1.989 to<br>28.490                           | 1.968 to<br>28.189                          | 1.317 to<br>28.410                                | 1.631 to<br>28.281                                                                   |
| Index ranges                         | -10 ≤ h ≤ 10<br>-27 ≤ k ≤ 27<br>-16 ≤ l ≤ 16 | -10 ≤ h ≤ 3<br>-27 ≤ k ≤ 13<br>-10 ≤ l ≤ 15 | -20 ≤ h ≤ 21<br>-28 ≤ k ≤ 28<br>-41 ≤ l ≤ 41      | -19 ≤ h ≤ 19<br>-25 ≤ k ≤ 25<br>-22 ≤ l ≤ 21                                         |
| Reflections<br>collected             | 34847                                        | 5268                                        | 64006                                             | 49445                                                                                |
| independent                          | 4693                                         | 3301                                        | 13088                                             | 11517                                                                                |
| R(int)                               | 0.0218                                       | 0.0667                                      | 0.1139                                            | 0.0274                                                                               |
| obs. (I>2σ)                          | 4236                                         | 1649                                        | 5733                                              | 8655                                                                                 |
| Coverage / % (θ=25°)                 | 100                                          | 79.6                                        | 100                                               | 100                                                                                  |
| Data/restraints/param.               | 4693/0/220                                   | 3301/18/217                                 | 13088/6/587                                       | 11517/45/567                                                                         |
| Goof on F <sup>2</sup>               | 0.956                                        | 1.017                                       | 0.853                                             | 1.015                                                                                |
| R1 [I>2σ(I)]                         | 0.0144                                       | 0.0835                                      | 0.0488                                            | 0.0268                                                                               |
| wR2 (all data)                       | 0.0301                                       | 0.1798                                      | 0.1126                                            | 0.0614                                                                               |
| Largest peak/hole/eÅ <sup>-3</sup>   | 0.368/-0.435                                 | 4.626/-3.000                                | 1.046/-1.461                                      | 0.540/-0.661                                                                         |

<sup>a</sup>The low quality crystal of (Cp)<sub>3</sub>Pu(C≡NCy) decomposed during the measurement.

Appendix to Table S1. Selected XRD results on the  $(\text{Cp})_3\text{La}(\text{C}\equiv\text{NCy})^*(\text{Cp})_3\text{La}(\text{C}\equiv\text{NCy})_2$  sample.

| complex                                                     | M-C $\equiv$ N | C $\equiv$ N | M-C $\text{Cp}_{\text{av}}$ |
|-------------------------------------------------------------|----------------|--------------|-----------------------------|
| $(\text{Cp})_3\text{La}(\text{C}\equiv\text{NCy})$ moiety   | 2.706(3)       | 1.143(3)     | 2.837                       |
| $(\text{Cp})_3\text{La}(\text{C}\equiv\text{NCy})_2$ moiety | 2.825(5)       | 1.142(5)     | 2.870                       |

Table S2. Selected computed data: the spinmultiplicities (m) used in the open-shell calculations, geometrical parameters ( $\text{\AA}$ ) and C $\equiv$ N stretching frequencies (C $\equiv$ N,  $\text{cm}^{-1}$ ).

| M   | m <sup>a</sup> | M-C $\equiv$ N | C $\equiv$ N <sup>b</sup> | M-C $\text{Cp}_{\text{av}}$ | C $\equiv$ N <sup>b</sup> |
|-----|----------------|----------------|---------------------------|-----------------------------|---------------------------|
| La  | 1              | 2.741          | 1.163                     | 2.874                       | 2263                      |
| La' | 1              | 2.817          | 1.165                     | 2.907                       | 2248                      |
| Ce  | 2              | 2.693          | 1.163                     | 2.843                       | 2258                      |
| Pr  | 3              | 2.668          | 1.163                     | 2.822                       | 2259                      |
| Nd  | 4              | 2.631          | 1.163                     | 2.808                       | 2257                      |
| Pm  | 5              | 2.625          | 1.163                     | 2.794                       | 2260                      |
| Sm  | 6              | 2.611          | 1.163                     | 2.783                       | 2258                      |
| Eu  | 7              | 2.661          | 1.164                     | 2.795                       | 2255                      |
| Gd  | 8              | 2.593          | 1.163                     | 2.794                       | 2260                      |
| Tb  | 7              | 2.540          | 1.163                     | 2.747                       | 2261                      |
| Dy  | 6              | 2.504          | 1.162                     | 2.754                       | 2263                      |
| Ho  | 5              | 2.490          | 1.163                     | 2.730                       | 2257                      |
| Er  | 4              | 2.478          | 1.163                     | 2.720                       | 2258                      |
| Tm  | 3              | 2.468          | 1.163                     | 2.712                       | 2257                      |
| Yb  | 2              | 2.474          | 1.163                     | 2.710                       | 2256                      |
| Lu  | 1              | 2.422          | 1.163                     | 2.699                       | 2257                      |
| U   | 4              | 2.495          | 1.170                     | 2.813                       | 2183                      |
| Np  | 5              | 2.557          | 1.166                     | 2.802                       | 2222                      |
| Pu  | 6              | 2.556          | 1.165                     | 2.783                       | 2240                      |

<sup>a</sup>Spinmultiplicities of the metals. La' corresponds to the axial-axial conformer of  $(\text{Cp})_3\text{La}(\text{C}\equiv\text{NCy})_2$ .

<sup>b</sup>The computed bond distance in the free C $\equiv$ NCy ligand is 1.170  $\text{\AA}$ , while the stretching frequency 2173  $\text{cm}^{-1}$ .

Table S3. Selected QTAIM data (au) of (Cp)<sub>3</sub>M(C≡NCy) complexes.<sup>a</sup>

| M   | Atomic charge <sup>b</sup> |                  |       | CT from |       | n-loc | DI                 |       | BCP at M-C <sub>CN</sub> |       |                    |
|-----|----------------------------|------------------|-------|---------|-------|-------|--------------------|-------|--------------------------|-------|--------------------|
|     | C≡NC                       |                  |       |         |       |       |                    |       |                          |       |                    |
|     | M                          | C <sub>C≡N</sub> | N     | 3Cp     | y     | M     | M-C <sub>C≡N</sub> | M-3Cp | (r)                      | ∇ (r) | H(r <sub>p</sub> ) |
| La  | 1.85                       | 0.82             | -1.44 | 1.12    | 0.03  | 1.40  | 0.25               | 2.44  | 0.036                    | 0.092 | -0.002             |
| La' | 1.88                       | 0.83             | -1.44 | 1.08    | 0.02  | 1.39  | 0.20               | 2.25  | 0.030                    | 0.082 | -0.001             |
| Ce  | 1.81                       | 0.82             | -1.44 | 1.16    | 0.03  | 1.46  | 0.27               | 2.53  | 0.039                    | 0.102 | -0.003             |
| Pr  | 1.78                       | 0.82             | -1.44 | 1.18    | 0.04  | 1.48  | 0.27               | 2.57  | 0.040                    | 0.105 | -0.003             |
| Nd  | 1.78                       | 0.82             | -1.44 | 1.20    | 0.02  | 1.47  | 0.28               | 2.54  | 0.042                    | 0.113 | -0.003             |
| Pm  | 1.78                       | 0.82             | -1.44 | 1.19    | 0.03  | 1.46  | 0.27               | 2.53  | 0.041                    | 0.112 | -0.003             |
| Sm  | 1.74                       | 0.82             | -1.44 | 1.23    | 0.03  | 1.48  | 0.27               | 2.57  | 0.041                    | 0.115 | -0.003             |
| Eu  | 1.65                       | 0.82             | -1.44 | 1.33    | 0.02  | 1.42  | 0.23               | 2.51  | 0.036                    | 0.108 | -0.001             |
| Gd  | 1.70                       | 0.82             | -1.44 | 1.28    | 0.02  | 1.44  | 0.27               | 2.49  | 0.042                    | 0.117 | -0.003             |
| Tb  | 1.83                       | 0.81             | -1.44 | 1.15    | 0.02  | 1.40  | 0.29               | 2.40  | 0.046                    | 0.127 | -0.005             |
| Dy  | 1.83                       | 0.81             | -1.43 | 1.15    | 0.02  | 1.38  | 0.30               | 2.35  | 0.049                    | 0.133 | -0.006             |
| Ho  | 1.87                       | 0.80             | -1.44 | 1.13    | 0.00  | 1.33  | 0.29               | 2.26  | 0.048                    | 0.144 | -0.006             |
| Er  | 1.88                       | 0.80             | -1.44 | 1.11    | 0.01  | 1.31  | 0.29               | 2.22  | 0.049                    | 0.146 | -0.006             |
| Tm  | 1.87                       | 0.80             | -1.44 | 1.12    | 0.01  | 1.32  | 0.28               | 2.25  | 0.049                    | 0.148 | -0.006             |
| Yb  | 1.86                       | 0.80             | -1.44 | 1.14    | 0.00  | 1.31  | 0.27               | 2.25  | 0.047                    | 0.147 | -0.005             |
| Lu  | 1.90                       | 0.79             | -1.44 | 1.10    | 0.00  | 1.26  | 0.30               | 2.13  | 0.053                    | 0.157 | -0.007             |
| U   | 1.87                       | 0.73             | -1.44 | 1.21    | -0.08 | 1.92  | 0.57               | 3.03  | 0.061                    | 0.174 | -0.011             |
| Np  | 1.79                       | 0.79             | -1.44 | 1.22    | -0.01 | 1.80  | 0.43               | 2.98  | 0.052                    | 0.152 | -0.007             |
| Pu  | 1.72                       | 0.81             | -1.44 | 1.27    | 0.01  | 1.79  | 0.40               | 3.02  | 0.051                    | 0.148 | -0.006             |

<sup>a</sup>The abbreviations in the heading mean: CT – charge transfer; n-loc – non-localised electrons (participating in the covalent interactions of M); DI – delocalization indices between M and C<sub>C≡N</sub> and summed over the 15 M-C<sub>Cp</sub> contacts; BCP – bond critical point; (r) - electron density; ∇ (r) - Laplacian of electron density; H(r) – total electronic energy density. La' refers to the (Cp)<sub>3</sub>La(C≡NCy)<sub>2</sub> complex with axial-axial orientations of the C≡NCy ligands.

<sup>b</sup>The charges of C<sub>C≡N</sub> and N in the free ligand are +0.87 and -1.48 e, respectively.

Table S4. Selected QTAIM data (au) of M(Cp)<sub>3</sub> complexes.<sup>a</sup>

| M  | Q(M) | CT(3Cp) | n-loc(M) | DI(M-3Cp) |
|----|------|---------|----------|-----------|
| La | 1.85 | 1.15    | 1.37     | 2.63      |
| Lu | 1.91 | 1.09    | 1.22     | 2.37      |
| U  | 1.83 | 1.17    | 1.69     | 3.24      |
| Np | 1.78 | 1.22    | 1.66     | 3.18      |
| Pu | 1.71 | 1.29    | 1.69     | 3.26      |

<sup>a</sup>The abbreviations in the heading mean: Q – atomic charge; CT – charge transfer from the 3 Cp ligands; n-loc – non-localised electrons; DI – delocalization indices summed over the 15 M-C<sub>Cp</sub> contacts.

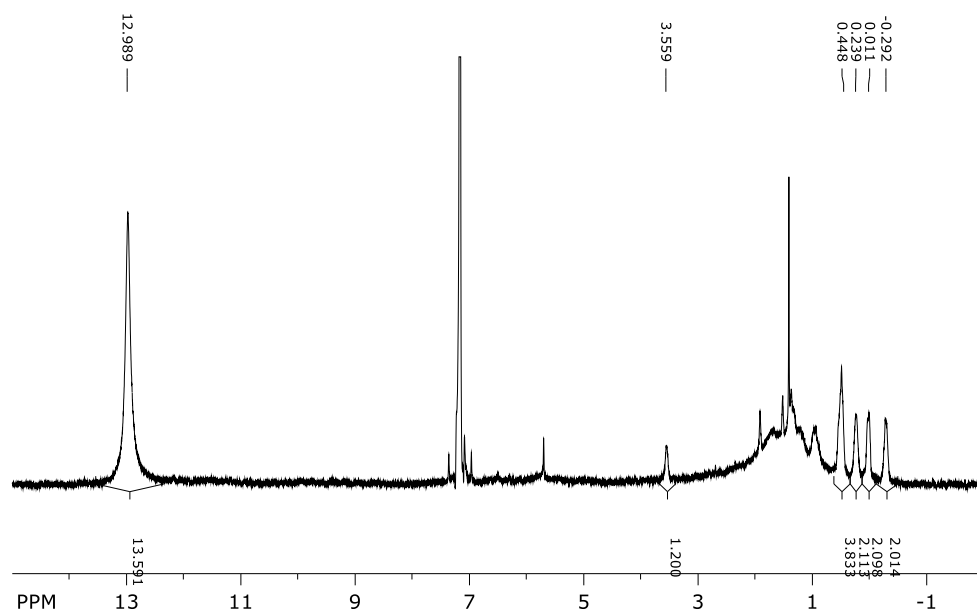

Figure S1.  $^1\text{H}$  NMR spectrum of  $(\text{Cp})_3\text{Pu}(\text{C}\equiv\text{NCy})$  measured in  $\text{C}_6\text{D}_6$ . Signal at 7.16 ppm is the residual proton signal of the solvent. Signals not marked with a peak picking do not arise from  $(\text{Cp})_3\text{Pu}(\text{C}\equiv\text{NCy})$ . The feature between 1 and 2 ppm is due to decomposition.

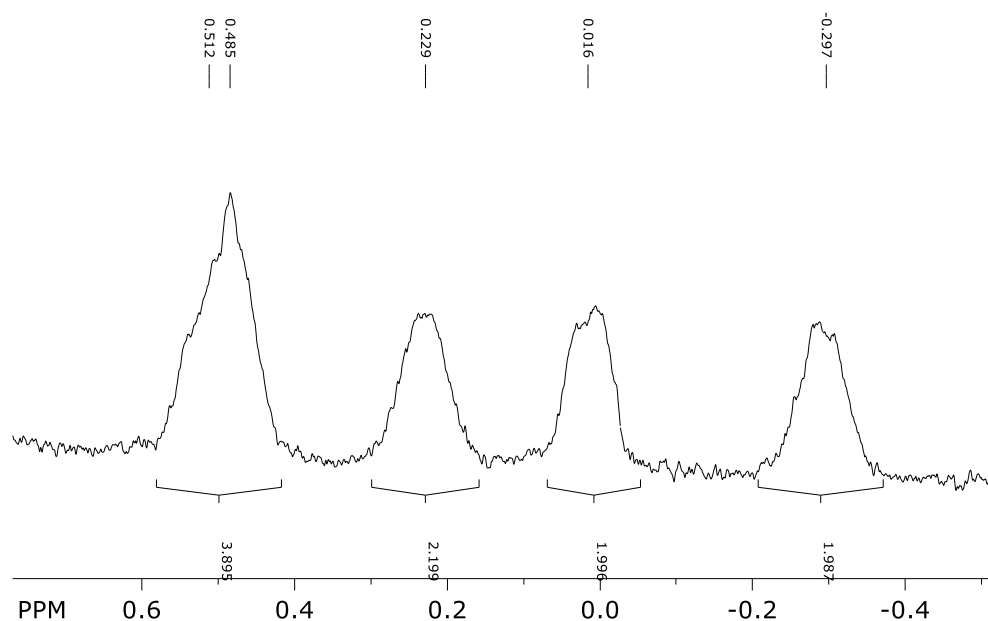

Figure S2. <sup>1</sup>H NMR spectrum of (Cp)<sub>3</sub>Pu(C≡NCy) measured in C<sub>6</sub>D<sub>6</sub>, in the range from 0.7 to -0.45 ppm representing the 10 protons of the five CH<sub>2</sub>-groups of the cyclohexyl residue.

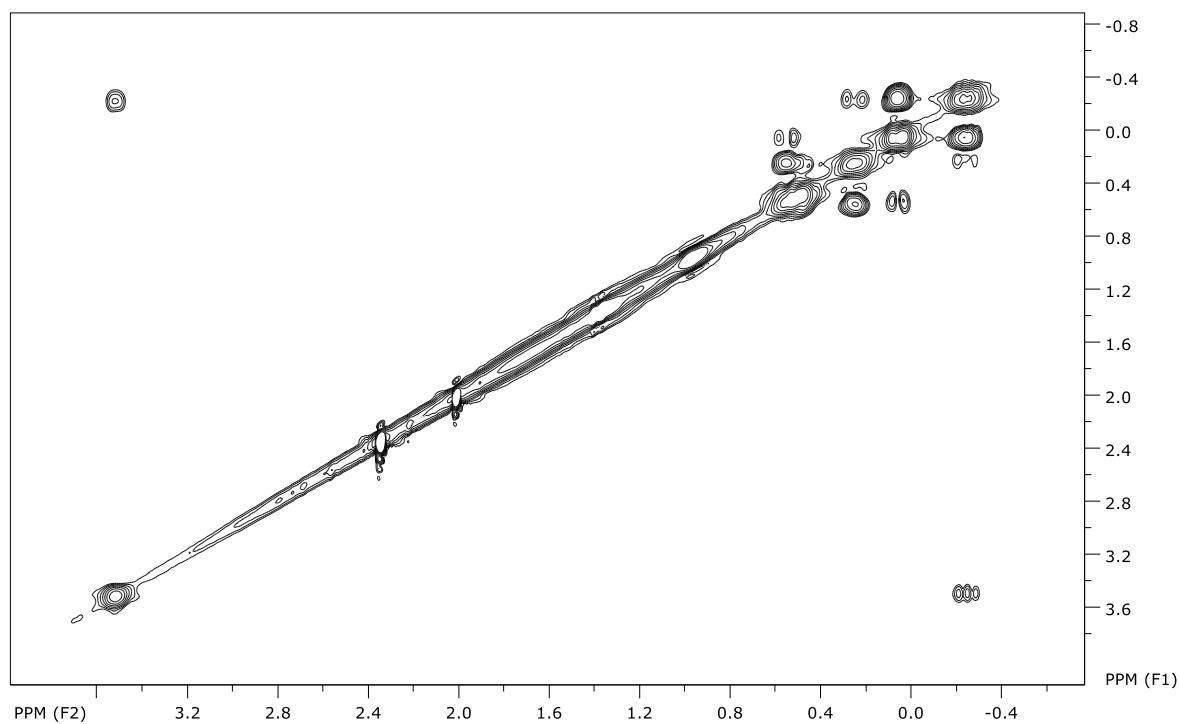

Figure S3. 2D HH correlation NMR spectrum of (Cp)<sub>3</sub>Pu(C≡NCy) measured in C<sub>6</sub>D<sub>6</sub>, in the range from 3.6 to -0.57 ppm, no other cross peaks are observed.



## Cartesian coordinates of the optimized structures

### (Cp)<sub>3</sub>La(C≡NCy)

|    |             |             |             |
|----|-------------|-------------|-------------|
| La | 1.48296800  | -0.00027700 | -0.04918300 |
| H  | -7.58730400 | -0.00056100 | -0.31290500 |
| H  | -6.30236900 | 2.16238800  | -0.27833700 |
| C  | -6.49944600 | 0.00114400  | -0.42603300 |
| H  | -6.29435600 | 0.00427400  | -1.50384200 |
| H  | -6.20159700 | 1.32284000  | 1.26034400  |
| C  | -5.90349200 | 1.26679800  | 0.20573100  |
| H  | -6.29675400 | -2.16030300 | -0.29011300 |
| H  | -6.19847600 | -1.32887000 | 1.25316700  |
| C  | -5.90028100 | -1.26635800 | 0.19894000  |
| C  | -4.37183700 | 1.27636000  | 0.10977100  |
| H  | -4.06104300 | 1.31152700  | -0.94025300 |
| H  | -3.95166700 | 2.15668700  | 0.60290600  |
| C  | -4.36857800 | -1.27153200 | 0.10324500  |
| H  | -4.05706300 | -1.30119000 | -0.94670400 |
| H  | -4.01393500 | -0.00139200 | 1.81693300  |
| C  | -3.78901500 | 0.00153400  | 0.74454000  |
| H  | -3.94659900 | -2.15313300 | 0.59258900  |
| N  | -2.35944400 | 0.00352600  | 0.62954500  |
| C  | -1.20740200 | 0.00401600  | 0.47349500  |
| H  | -0.68189600 | 2.57779600  | -1.05436900 |
| H  | -0.18277300 | -0.70309500 | -3.02030900 |
| H  | -0.70264100 | -2.53415000 | -1.11755400 |
| C  | 0.39314800  | 2.51981600  | -0.95446900 |
| H  | 0.22771600  | -0.04601200 | 3.22630300  |
| H  | 0.73336500  | 3.17424800  | 1.15439500  |
| H  | 1.04377400  | 1.85166900  | -2.97608900 |
| C  | 0.55216400  | -1.26312500 | -2.45878500 |
| C  | 0.27850000  | -2.22448800 | -1.45005500 |
| C  | 1.14008700  | 2.84174200  | 0.20942900  |
| C  | 1.30157100  | 2.14972400  | -1.97032000 |
| C  | 1.19215800  | -0.29824300 | 2.80756300  |
| H  | 0.97938800  | -2.47244200 | 2.34053900  |
| C  | 1.59053600  | -1.58057000 | 2.34613500  |
| H  | 2.30231500  | 1.62795900  | 2.92434700  |
| C  | 1.95277900  | -1.18251000 | -2.61316700 |
| C  | 2.28757600  | 0.58069100  | 2.65999000  |
| C  | 1.51016000  | -2.73379000 | -0.98392100 |
| H  | 2.47994200  | -0.54962700 | -3.31303600 |
| C  | 2.50828900  | 2.67009700  | -0.09158100 |
| C  | 2.61004900  | 2.23045700  | -1.43675600 |
| H  | 1.63851200  | -3.48342900 | -0.21687100 |
| C  | 2.54827700  | -2.08321200 | -1.69289200 |
| H  | 3.33462100  | 2.84772700  | 0.58217500  |
| H  | 3.52851000  | 2.03334200  | -1.97354900 |
| C  | 2.93159100  | -1.48986400 | 1.91517200  |
| C  | 3.36154200  | -0.15014400 | 2.09784700  |
| H  | 3.60797400  | -2.27157200 | -1.58272800 |
| H  | 3.52902300  | -2.29983100 | 1.52096100  |
| H  | 4.35003900  | 0.23497600  | 1.88535300  |

**(Cp)<sub>3</sub>Tb(C≡NCy)**

|    |             |             |             |
|----|-------------|-------------|-------------|
| Tb | 1.37925200  | -0.00032200 | -0.04009800 |
| H  | -7.49729500 | -0.00136600 | -0.32557500 |
| H  | -6.21213600 | 2.16151400  | -0.30000900 |
| C  | -6.40976700 | -0.00006500 | -0.44200300 |
| H  | -6.20794400 | 0.00048800  | -1.52044600 |
| H  | -6.10646700 | 1.32552300  | 1.24030700  |
| C  | -5.81170200 | 1.26704200  | 0.18488200  |
| H  | -6.20708800 | -2.16122100 | -0.30160900 |
| H  | -6.10376900 | -1.32610300 | 1.23937500  |
| C  | -5.80883600 | -1.26620600 | 0.18407300  |
| C  | -4.28038500 | 1.27595700  | 0.08416300  |
| H  | -3.97295700 | 1.30843700  | -0.96698700 |
| H  | -3.85840300 | 2.15750400  | 0.57362400  |
| C  | -4.27745800 | -1.27162800 | 0.08375200  |
| H  | -3.96912900 | -1.30390600 | -0.96710400 |
| H  | -3.91772300 | 0.00239500  | 1.79313000  |
| C  | -3.69520000 | 0.00275000  | 0.72010400  |
| H  | -3.85405500 | -2.15216100 | 0.57387300  |
| N  | -2.26714200 | 0.00430800  | 0.59973700  |
| C  | -1.11676600 | 0.00437800  | 0.43113000  |
| H  | -0.75953200 | 2.47149100  | -1.04595300 |
| H  | -0.22940800 | -0.58852900 | -2.90883600 |
| H  | -0.76814000 | -2.45948600 | -1.05350800 |
| C  | 0.31243300  | 2.40926000  | -0.93315700 |
| H  | 0.07558100  | -0.00991300 | 3.11290200  |
| H  | 0.62537900  | 3.01051100  | 1.19380200  |
| H  | 0.97906700  | 1.72167800  | -2.93606400 |
| C  | 0.49893500  | -1.16740300 | -2.36176500 |
| C  | 0.21483000  | -2.14727800 | -1.37291300 |
| C  | 1.04491700  | 2.70639700  | 0.24713000  |
| C  | 1.22879100  | 2.03187600  | -1.93418300 |
| C  | 1.04197100  | -0.26270500 | 2.70318800  |
| H  | 0.81421200  | -2.42182100 | 2.18435500  |
| C  | 1.43571400  | -1.54040100 | 2.22339100  |
| H  | 2.14159300  | 1.66285400  | 2.81191000  |
| C  | 1.89959500  | -1.06957100 | -2.48283900 |
| C  | 2.13495800  | 0.61442600  | 2.56084200  |
| C  | 1.43874000  | -2.64893100 | -0.88921200 |
| H  | 2.43635300  | -0.40368200 | -3.13953300 |
| C  | 2.41224500  | 2.51000100  | -0.03229000 |
| C  | 2.52802100  | 2.07121100  | -1.37599600 |
| H  | 1.55704500  | -3.38699100 | -0.11234000 |
| C  | 2.48505600  | -1.96968700 | -1.55645800 |
| H  | 3.22786800  | 2.63769100  | 0.66147300  |
| H  | 3.44839800  | 1.83028300  | -1.88717700 |
| C  | 2.77217300  | -1.44468500 | 1.78605600  |
| C  | 3.20141100  | -0.10606000 | 1.97367600  |
| H  | 3.54316100  | -2.12360700 | -1.40417700 |
| H  | 3.35843800  | -2.23960300 | 1.35328400  |
| H  | 4.17754500  | 0.28671700  | 1.73008000  |

**(Cp)<sub>3</sub>Lu(C≡NCy)**

|    |             |             |             |
|----|-------------|-------------|-------------|
| Lu | 1.31422100  | -0.00007900 | -0.03636400 |
| H  | -7.44899900 | -0.00093900 | -0.32245600 |
| H  | -6.16204800 | 2.16091400  | -0.30374500 |
| C  | -6.36182800 | -0.00067500 | -0.44239700 |
| H  | -6.16348700 | -0.00162900 | -1.52150100 |
| H  | -6.05183600 | 1.32668000  | 1.23723100  |
| C  | -5.76061500 | 1.26672500  | 0.18089300  |
| H  | -6.16059800 | -2.16181400 | -0.29994200 |
| H  | -6.05135100 | -1.32477600 | 1.23960300  |
| C  | -5.75984000 | -1.26654000 | 0.18324600  |
| C  | -4.22965400 | 1.27405500  | 0.07513000  |
| H  | -3.92574100 | 1.30488600  | -0.97712100 |
| H  | -3.80520300 | 2.15594000  | 0.56188000  |
| C  | -4.22881600 | -1.27323500 | 0.07794300  |
| H  | -3.92394600 | -1.30714400 | -0.97389800 |
| H  | -3.86291400 | 0.00247900  | 1.78439300  |
| C  | -3.64287100 | 0.00131200  | 0.71071600  |
| H  | -3.80451900 | -2.15355200 | 0.56772700  |
| N  | -2.21610600 | 0.00168700  | 0.58548200  |
| C  | -1.06672300 | 0.00166200  | 0.40669400  |
| H  | -0.81975700 | 2.43289500  | -1.06216000 |
| H  | -0.27607700 | -0.57805000 | -2.88637300 |
| H  | -0.81299300 | -2.45033100 | -1.02943900 |
| C  | 0.24994800  | 2.35472300  | -0.93423500 |
| H  | -0.00325800 | 0.00929300  | 3.08381200  |
| H  | 0.54453800  | 2.97963700  | 1.19037400  |
| H  | 0.93479800  | 1.68505400  | -2.93562900 |
| C  | 0.45388900  | -1.13709600 | -2.32009100 |
| C  | 0.17004700  | -2.12038900 | -1.33200500 |
| C  | 0.97211900  | 2.65302600  | 0.25420900  |
| C  | 1.17528900  | 1.98031600  | -1.92666400 |
| C  | 0.95803700  | -0.23936000 | 2.65854600  |
| H  | 0.73746000  | -2.40595200 | 2.16092300  |
| C  | 1.35259900  | -1.51871900 | 2.17875000  |
| H  | 2.06189500  | 1.68123300  | 2.78691700  |
| C  | 1.85462700  | -1.03362500 | -2.43451700 |
| C  | 2.05157600  | 0.63630300  | 2.52046400  |
| C  | 1.39344800  | -2.61792300 | -0.84561300 |
| H  | 2.39313000  | -0.38503400 | -3.10770600 |
| C  | 2.34182100  | 2.45784300  | -0.01392400 |
| C  | 2.46994600  | 2.01386000  | -1.35559600 |
| H  | 1.51070300  | -3.36814700 | -0.07987000 |
| C  | 2.44079300  | -1.92863400 | -1.50250600 |
| H  | 3.15507700  | 2.61273600  | 0.67785400  |
| H  | 3.39760600  | 1.79575000  | -1.86520500 |
| C  | 2.69003700  | -1.42229800 | 1.74462100  |
| C  | 3.11798100  | -0.08197900 | 1.92870700  |
| H  | 3.49946300  | -2.09417500 | -1.36233700 |
| H  | 3.28771800  | -2.22317500 | 1.33797500  |
| H  | 4.10256200  | 0.30492600  | 1.70791600  |

**(Cp)<sub>3</sub>U(C≡NCy)**

|   |             |             |             |
|---|-------------|-------------|-------------|
| U | 1.24926800  | 0.00007900  | -0.05018300 |
| H | -7.57606500 | -0.00002600 | -0.31163500 |
| H | -6.28921100 | 2.16148300  | -0.28094000 |
| C | -6.48772400 | 0.00005200  | -0.42206600 |
| H | -6.27992700 | -0.00064400 | -1.49948100 |
| H | -6.19128300 | 1.32618400  | 1.26044800  |
| C | -5.89112200 | 1.26707400  | 0.20647800  |
| H | -6.28862600 | -2.16107700 | -0.27843800 |
| H | -6.19138500 | -1.32394200 | 1.26204200  |
| C | -5.89087600 | -1.26604300 | 0.20810000  |
| C | -4.35939600 | 1.27317900  | 0.11393100  |
| H | -4.04630600 | 1.30391700  | -0.93577100 |
| H | -3.93860700 | 2.15528100  | 0.60364800  |
| C | -4.35909300 | -1.27205900 | 0.11602800  |
| H | -4.04498100 | -1.30547500 | -0.93324100 |
| H | -4.01194000 | 0.00210300  | 1.82515800  |
| C | -3.77426000 | 0.00115900  | 0.75447000  |
| H | -3.93888200 | -2.15304100 | 0.60833100  |
| N | -2.34976100 | 0.00115800  | 0.64356500  |
| C | -1.19533500 | 0.00113000  | 0.44827400  |
| H | -0.92490000 | 2.51670400  | -1.03491400 |
| H | -0.63030800 | -0.54899200 | -2.88803200 |
| H | -0.92949900 | -2.50114900 | -1.06143200 |
| C | 0.13940600  | 2.48037600  | -0.85494400 |
| H | -0.02496600 | -0.06233200 | 3.17250200  |
| H | 0.29724400  | 3.02147900  | 1.30665800  |
| H | 0.96036200  | 1.95203400  | -2.85271100 |
| C | 0.16704800  | -1.10783200 | -2.41938700 |
| C | 0.00946000  | -2.13195700 | -1.44689200 |
| C | 0.78582000  | 2.75851600  | 0.37944100  |
| C | 1.13293800  | 2.18687300  | -1.81370100 |
| C | 0.91294300  | -0.37454100 | 2.73748500  |
| H | 0.52629400  | -2.50762100 | 2.19962500  |
| C | 1.20761700  | -1.66963600 | 2.23336600  |
| H | 2.17068100  | 1.45098400  | 2.91274600  |
| C | 1.54646000  | -0.95804600 | -2.67359500 |
| C | 2.07093900  | 0.42174800  | 2.60408500  |
| C | 1.29201700  | -2.60732300 | -1.09928200 |
| H | 1.99411400  | -0.27007700 | -3.37551100 |
| C | 2.17699300  | 2.64141500  | 0.17782200  |
| C | 2.39675300  | 2.27048200  | -1.17439600 |
| H | 1.50509500  | -3.39826100 | -0.39678400 |
| C | 2.24892300  | -1.87204900 | -1.84555900 |
| H | 2.94422000  | 2.80417700  | 0.92040000  |
| H | 3.35996100  | 2.13301200  | -1.64765200 |
| C | 2.54862700  | -1.67127000 | 1.79537400  |
| C | 3.08282600  | -0.37350100 | 2.00711100  |
| H | 3.32025800  | -2.02247000 | -1.83051400 |
| H | 3.07976600  | -2.51129000 | 1.37234500  |
| H | 4.09876000  | -0.06281700 | 1.80221400  |

**(Cp)<sub>3</sub>Np(C≡NCy)**

|    |             |             |             |
|----|-------------|-------------|-------------|
| Np | 1.23613800  | 0.00691300  | -0.04044100 |
| H  | -7.63025600 | 0.04112400  | -0.30243200 |
| H  | -6.36424400 | 2.19477600  | -0.00509400 |
| C  | -6.54121900 | 0.06345200  | -0.40208800 |
| H  | -6.32465400 | 0.19160600  | -1.47003100 |
| H  | -6.27146600 | 1.18449000  | 1.42794900  |
| C  | -5.96222800 | 1.25245300  | 0.37718800  |
| H  | -6.32232700 | -2.09780400 | -0.51231700 |
| H  | -6.24646200 | -1.44773200 | 1.11701700  |
| C  | -5.93788500 | -1.26303900 | 0.08019500  |
| C  | -4.42987200 | 1.28328400  | 0.29980500  |
| H  | -4.10863600 | 1.44074600  | -0.73583300 |
| H  | -4.02200600 | 2.10458600  | 0.89482200  |
| C  | -4.40539900 | -1.24600600 | 0.00179200  |
| H  | -4.08245400 | -1.15349300 | -1.04107200 |
| H  | -4.07925800 | -0.17838100 | 1.85283900  |
| C  | -3.84049200 | -0.05106200 | 0.79066400  |
| H  | -3.98112300 | -2.17495200 | 0.39157700  |
| N  | -2.41253400 | -0.02748100 | 0.68922000  |
| C  | -1.26096800 | -0.01100800 | 0.50891100  |
| H  | -0.86700800 | 2.73438100  | -0.45952200 |
| H  | -0.70504000 | -0.29507800 | -2.83727800 |
| H  | -1.04090600 | -2.36006300 | -1.14205700 |
| C  | 0.20358100  | 2.59903300  | -0.50648200 |
| H  | 0.08244100  | -0.49792100 | 3.17348400  |
| H  | 0.84686500  | 2.97586800  | 1.59727400  |
| H  | 0.55122100  | 2.13147300  | -2.65416200 |
| C  | 0.07990700  | -0.90829600 | -2.41882100 |
| C  | -0.09683900 | -1.99634900 | -1.52069800 |
| C  | 1.10987700  | 2.73624000  | 0.57704500  |
| C  | 0.95246800  | 2.29579300  | -1.66563000 |
| C  | 1.02955300  | -0.67883100 | 2.68590700  |
| H  | 0.80656500  | -2.76562300 | 1.93000300  |
| C  | 1.41553400  | -1.87998900 | 2.03812800  |
| H  | 2.13931200  | 1.22404300  | 3.02465000  |
| C  | 1.46095900  | -0.79325900 | -2.69113600 |
| C  | 2.11509800  | 0.22533800  | 2.61545900  |
| C  | 1.17127500  | -2.54218700 | -1.23752700 |
| H  | 1.92089100  | -0.07307700 | -3.35138700 |
| C  | 2.41612200  | 2.52199300  | 0.08396000  |
| C  | 2.31972900  | 2.24089700  | -1.30419000 |
| H  | 1.37032100  | -3.38097600 | -0.58825600 |
| C  | 2.14160100  | -1.79123300 | -1.94794600 |
| H  | 3.32880900  | 2.57474000  | 0.66005500  |
| H  | 3.14740000  | 2.05388100  | -1.97423900 |
| C  | 2.73980300  | -1.71879200 | 1.57195400  |
| C  | 3.16976100  | -0.41274200 | 1.91920700  |
| H  | 3.20655600  | -1.97934100 | -1.96182600 |
| H  | 3.32466600  | -2.46081800 | 1.04833900  |
| H  | 4.14554500  | 0.00889700  | 1.71981800  |

**(Cp)<sub>3</sub>Pu(C≡NCy)**

|    |             |             |             |
|----|-------------|-------------|-------------|
| Pu | 1.25135600  | -0.00032700 | -0.04393300 |
| H  | -7.63684500 | -0.00141100 | -0.32204300 |
| H  | -6.35241700 | 2.16173600  | -0.29126400 |
| C  | -6.54891800 | 0.00022000  | -0.43526500 |
| H  | -6.34389500 | 0.00151700  | -1.51313700 |
| H  | -6.25051500 | 1.32455100  | 1.24872200  |
| C  | -5.95277000 | 1.26705900  | 0.19404200  |
| H  | -6.34633600 | -2.16095900 | -0.29565500 |
| H  | -6.24720700 | -1.32660000 | 1.24608200  |
| C  | -5.94930500 | -1.26618200 | 0.19160800  |
| C  | -4.42123500 | 1.27600500  | 0.09769100  |
| H  | -4.11078500 | 1.30917900  | -0.95260100 |
| H  | -4.00058400 | 2.15743400  | 0.58858700  |
| C  | -4.41770800 | -1.27079500 | 0.09567200  |
| H  | -4.10628900 | -1.30232500 | -0.95434500 |
| H  | -4.06371600 | 0.00183300  | 1.80653200  |
| C  | -3.83623200 | 0.00292700  | 0.73435700  |
| H  | -3.99525500 | -2.15162700 | 0.58615800  |
| N  | -2.40908200 | 0.00483600  | 0.61735200  |
| C  | -1.25762700 | 0.00496300  | 0.44241600  |
| H  | -0.95696600 | 2.46774700  | -1.02479200 |
| H  | -0.43597800 | -0.61848000 | -2.91981800 |
| H  | -0.96529600 | -2.45673700 | -1.02971900 |
| C  | 0.11689200  | 2.42280600  | -0.92130500 |
| H  | -0.10818000 | -0.01161500 | 3.12578800  |
| H  | 0.44135100  | 3.05062800  | 1.19529400  |
| H  | 0.77995200  | 1.76262800  | -2.93898600 |
| C  | 0.29491100  | -1.19026800 | -2.36727500 |
| C  | 0.01567100  | -2.15679100 | -1.36687100 |
| C  | 0.85520500  | 2.73552500  | 0.24887900  |
| C  | 1.03211400  | 2.06293500  | -1.93372500 |
| C  | 0.86236000  | -0.26817700 | 2.72811300  |
| H  | 0.64400200  | -2.43344100 | 2.23521700  |
| C  | 1.26076500  | -1.54733400 | 2.26210900  |
| H  | 1.97358300  | 1.65375500  | 2.86062100  |
| C  | 1.69861800  | -1.11934500 | -2.52377400 |
| C  | 1.96213700  | 0.60697900  | 2.59907900  |
| C  | 1.24399500  | -2.67307400 | -0.90177200 |
| H  | 2.22953000  | -0.48665700 | -3.21930000 |
| C  | 2.22870600  | 2.57628700  | -0.04788900 |
| C  | 2.33881200  | 2.14946200  | -1.39553200 |
| H  | 1.36730900  | -3.41957200 | -0.13251600 |
| C  | 2.28749300  | -2.02866700 | -1.60922600 |
| H  | 3.05008200  | 2.75221300  | 0.63063300  |
| H  | 3.25928800  | 1.95212800  | -1.92732700 |
| C  | 2.61213900  | -1.46045300 | 1.85409200  |
| C  | 3.04404900  | -0.12455900 | 2.05216200  |
| H  | 3.34558700  | -2.21783400 | -1.49226400 |
| H  | 3.21173900  | -2.26942000 | 1.46409500  |
| H  | 4.03346900  | 0.26105300  | 1.84873500  |

**(Cp)<sub>3</sub>La(C≡NCy)<sub>2</sub> axial-axial**

|    |             |             |             |
|----|-------------|-------------|-------------|
| La | 0.01729400  | -0.56060100 | -0.00320600 |
| N  | -3.87397100 | -0.46166800 | 0.74620800  |
| C  | 0.45248900  | -2.11897100 | -2.42879100 |
| H  | 1.48378500  | -2.30184800 | -2.69325100 |
| C  | -0.32714200 | -1.01094100 | -2.84165900 |
| H  | 0.00912500  | -0.19484800 | -3.46546000 |
| C  | -1.62198200 | -1.16372300 | -2.29798900 |
| H  | -2.45392600 | -0.48713600 | -2.43852000 |
| C  | -1.64239900 | -2.37002200 | -1.55003900 |
| H  | -2.49284000 | -2.77845900 | -1.02295400 |
| C  | -0.36118900 | -2.95747300 | -1.63199900 |
| H  | -0.05710200 | -3.88455800 | -1.16776000 |
| C  | -2.71023400 | -0.49914400 | 0.71707200  |
| C  | -5.29908700 | -0.32722400 | 0.60264200  |
| H  | -5.73503000 | -1.27677700 | 0.92427100  |
| C  | -5.62770600 | -0.07130900 | -0.88256900 |
| H  | -6.71815100 | -0.11434700 | -0.98137800 |
| H  | -5.21259200 | -0.87766900 | -1.49250700 |
| C  | -5.11261000 | 1.29639900  | -1.34905100 |
| H  | -4.01725700 | 1.29531000  | -1.33289000 |
| H  | -5.40730400 | 1.46058100  | -2.38928700 |
| C  | -5.64093600 | 2.42933600  | -0.45628400 |
| H  | -6.72989300 | 2.50362200  | -0.57488100 |
| H  | -5.22367800 | 3.38725400  | -0.77946000 |
| C  | -5.31050600 | 2.18524600  | 1.02403100  |
| H  | -4.22713800 | 2.24128300  | 1.17361400  |
| H  | -5.74939100 | 2.96982900  | 1.64690900  |
| C  | -5.81467900 | 0.81581100  | 1.49744300  |
| H  | -6.90905500 | 0.78492800  | 1.45328000  |
| H  | -5.52708300 | 0.62759400  | 2.53515500  |
| C  | 1.11432200  | 2.06662000  | 0.48907700  |
| H  | 2.05424400  | 2.05319400  | 1.02339800  |
| C  | -0.16878300 | 2.13047400  | 1.07514500  |
| H  | -0.38465300 | 2.16998800  | 2.13337800  |
| C  | -1.12389100 | 2.14121600  | 0.02892900  |
| H  | -2.19418600 | 2.21286700  | 0.14919000  |
| C  | -0.43182200 | 2.08552300  | -1.20207800 |
| H  | -0.88090700 | 2.07772700  | -2.18472000 |
| C  | 0.95062700  | 2.03822900  | -0.92086100 |
| H  | 1.74206400  | 2.00164200  | -1.65573300 |
| N  | 3.88130300  | -0.43663900 | -0.87433900 |
| C  | -0.36488900 | -1.46747300 | 2.72618100  |
| H  | -1.29456300 | -1.16309100 | 3.18500900  |
| C  | 0.86129000  | -0.76859400 | 2.79424500  |
| H  | 1.03214400  | 0.16833900  | 3.30464700  |
| C  | 1.82596900  | -1.51294000 | 2.07890500  |
| H  | 2.86966700  | -1.25739700 | 1.96952200  |
| C  | 1.19591400  | -2.67545300 | 1.56658800  |
| H  | 1.67153900  | -3.45033700 | 0.98166800  |
| C  | -0.15817200 | -2.64753600 | 1.96761200  |
| H  | -0.90420200 | -3.39665400 | 1.74113400  |
| C  | 2.73016600  | -0.56768400 | -0.75592900 |
| C  | 5.29406800  | -0.16558000 | -0.86536500 |
| H  | 5.76580700  | -0.94794700 | -1.46570900 |
| C  | 5.81188900  | -0.23074500 | 0.58585600  |
| H  | 6.90459600  | -0.16455400 | 0.53857000  |
| H  | 5.56434400  | -1.20335000 | 1.01908600  |
| C  | 5.25538500  | 0.91478100  | 1.44154700  |
| H  | 4.17352900  | 0.78786700  | 1.55693800  |

|   |            |            |             |
|---|------------|------------|-------------|
| H | 5.68345800 | 0.85897400 | 2.44630100  |
| C | 5.54694300 | 2.28219400 | 0.80608200  |
| H | 6.63124000 | 2.45482000 | 0.80163100  |
| H | 5.10443700 | 3.07910800 | 1.41054000  |
| C | 5.01439800 | 2.35784700 | -0.63240500 |
| H | 3.92099400 | 2.31284100 | -0.61915400 |
| H | 5.27897600 | 3.31632600 | -1.08774200 |
| C | 5.56291200 | 1.21471500 | -1.49653700 |
| H | 6.64972500 | 1.31120300 | -1.59779000 |
| H | 5.14011500 | 1.24462500 | -2.50421000 |



**(Cp)<sub>3</sub>La(C≡NCy)<sub>2</sub> axial-equatorial**

|    |             |             |             |
|----|-------------|-------------|-------------|
| La | 0.17744700  | 0.17378400  | -0.14558600 |
| N  | 4.01888400  | 0.42514400  | -1.08241300 |
| N  | -3.65781400 | -0.25862400 | 0.80938200  |
| C  | 1.79233200  | 1.50562400  | 1.86502500  |
| H  | 2.61369000  | 2.09046800  | 1.47583900  |
| C  | 1.83327600  | 0.13095800  | 2.21683200  |
| H  | 2.69124200  | -0.52271200 | 2.14201900  |
| C  | 0.55683900  | -0.23304300 | 2.69929300  |
| H  | 0.26513900  | -1.21245400 | 3.05113300  |
| C  | -0.27261100 | 0.91379100  | 2.64535100  |
| H  | -1.30353400 | 0.96573100  | 2.96387800  |
| C  | 0.49152900  | 1.98633100  | 2.13101000  |
| H  | 0.14183500  | 2.99567100  | 1.96880000  |
| C  | -0.02232500 | 2.84347900  | -1.24296200 |
| H  | 0.53632600  | 3.59091500  | -0.69754200 |
| C  | -1.35870500 | 2.45871200  | -0.99500800 |
| H  | -2.00518000 | 2.86245100  | -0.22788100 |
| C  | -1.70716100 | 1.45775800  | -1.93900600 |
| H  | -2.66761200 | 0.96931600  | -2.02336200 |
| C  | -0.58633800 | 1.22607200  | -2.76586900 |
| H  | -0.53535200 | 0.52160100  | -3.58345700 |
| C  | 0.45550300  | 2.08082000  | -2.33665900 |
| H  | 1.43816400  | 2.15416600  | -2.77930100 |
| C  | 1.46738100  | -2.32387500 | -0.97732500 |
| H  | 2.54121400  | -2.30508600 | -1.09095100 |
| C  | 0.76401700  | -2.68288400 | 0.19471900  |
| H  | 1.20518900  | -2.95809400 | 1.14187200  |
| C  | -0.61763500 | -2.61785800 | -0.09083000 |
| H  | -1.41797100 | -2.84811000 | 0.59788300  |
| C  | -0.76962200 | -2.21871600 | -1.44410800 |
| H  | -1.70671000 | -2.08475000 | -1.96685400 |
| C  | 0.51941300  | -2.03684900 | -1.99131300 |
| H  | 0.74528600  | -1.74105600 | -3.00599900 |
| C  | 2.86487400  | 0.46506800  | -0.93050500 |
| C  | 5.44500200  | 0.23989700  | -1.11942100 |
| H  | 5.77825800  | 0.57177300  | -2.10623400 |
| C  | 5.76296000  | -1.25740000 | -0.93084900 |
| H  | 6.83803000  | -1.38024000 | -1.10341300 |
| H  | 5.24311200  | -1.84093100 | -1.69520900 |
| C  | 5.40026600  | -1.74276700 | 0.47876800  |
| H  | 4.31329800  | -1.70026300 | 0.60743500  |
| H  | 5.68447600  | -2.79333200 | 0.58574300  |
| C  | 6.08088300  | -0.88781300 | 1.55809700  |
| H  | 7.16789900  | -1.03110500 | 1.49965200  |
| H  | 5.77294800  | -1.22363300 | 2.55242000  |
| C  | 5.75536300  | 0.60316000  | 1.38446000  |
| H  | 4.68990500  | 0.76875800  | 1.57114100  |
| H  | 6.29513900  | 1.20017400  | 2.12488000  |
| C  | 6.10965100  | 1.09704200  | -0.02436300 |
| H  | 7.19189200  | 1.03099700  | -0.18290300 |
| H  | 5.82633900  | 2.14447500  | -0.15728800 |
| C  | -2.51037700 | -0.16215800 | 0.63358400  |
| C  | -5.08416400 | -0.34568000 | 0.91214200  |
| H  | -5.31394500 | -0.54304500 | 1.96538800  |
| C  | -5.60526000 | -1.51368200 | 0.05650300  |
| H  | -5.14367500 | -2.44665200 | 0.39003800  |
| H  | -5.28969100 | -1.34805800 | -0.97955500 |
| C  | -7.13565100 | -1.59404000 | 0.13456400  |
| H  | -7.48995900 | -2.40807200 | -0.50395500 |

|   |             |             |             |
|---|-------------|-------------|-------------|
| H | -7.43426700 | -1.84854700 | 1.15954100  |
| C | -7.79023200 | -0.26623800 | -0.27151000 |
| H | -7.58063900 | -0.06943100 | -1.33036800 |
| H | -8.87755700 | -0.33554500 | -0.17345200 |
| C | -7.25487600 | 0.89781200  | 0.57392900  |
| H | -7.55956900 | 0.75853200  | 1.61907100  |
| H | -7.69312100 | 1.84430600  | 0.24540400  |
| C | -5.72504900 | 0.99105400  | 0.49880700  |
| H | -5.41102300 | 1.22153100  | -0.52517200 |
| H | -5.34723000 | 1.79142800  | 1.14023200  |

**(Cp)<sub>3</sub>La(C≡NCy)<sub>2</sub> equatorial-equatorial**

|    |             |             |             |
|----|-------------|-------------|-------------|
| La | -0.00263000 | 0.20225100  | -0.02128600 |
| N  | 3.91235700  | 0.12579800  | 0.66641800  |
| C  | -1.45980900 | -0.21232200 | 2.43328300  |
| H  | -2.22827800 | -0.97000000 | 2.36303600  |
| C  | -1.62763900 | 1.17432300  | 2.18056200  |
| H  | -2.54796500 | 1.66157200  | 1.89113500  |
| C  | -0.38605400 | 1.81194000  | 2.39466900  |
| H  | -0.18641900 | 2.86797000  | 2.28299800  |
| C  | 0.54999000  | 0.82437300  | 2.77885700  |
| H  | 1.58580800  | 0.99772900  | 3.03201100  |
| C  | -0.11386800 | -0.42703500 | 2.80375500  |
| H  | 0.33077300  | -1.37707400 | 3.06453400  |
| C  | 1.54628500  | 1.93435700  | -1.76912200 |
| H  | 2.58764000  | 1.67016700  | -1.88592100 |
| C  | 1.01014000  | 2.79304200  | -0.77497600 |
| H  | 1.56983800  | 3.28860400  | 0.00627900  |
| C  | -0.38164600 | 2.89456300  | -0.99310800 |
| H  | -1.07628800 | 3.48008100  | -0.40711500 |
| C  | -0.70586400 | 2.09811700  | -2.11993000 |
| H  | -1.68892300 | 1.98071900  | -2.55247500 |
| C  | 0.48586000  | 1.50681200  | -2.59807100 |
| H  | 0.57105500  | 0.84499700  | -3.44784100 |
| C  | 2.75426400  | 0.17915800  | 0.55310700  |
| C  | 5.34024200  | 0.01844600  | 0.70677000  |
| H  | 5.66251200  | 0.45183400  | 1.66043300  |
| C  | 5.96302200  | 0.82371800  | -0.44718400 |
| H  | 5.65754200  | 1.87035500  | -0.37004800 |
| H  | 5.56257500  | 0.43754700  | -1.39112600 |
| C  | 7.49156900  | 0.68998300  | -0.42995400 |
| H  | 7.91431100  | 1.24128800  | -1.27447900 |
| H  | 7.88710600  | 1.16023300  | 0.47939600  |
| C  | 7.92811400  | -0.78107300 | -0.47351700 |
| H  | 9.01852400  | -0.85321700 | -0.42338500 |
| H  | 7.62656500  | -1.21873800 | -1.43340400 |
| C  | 7.29079300  | -1.58333100 | 0.66957900  |
| H  | 7.67761400  | -1.21851900 | 1.62969100  |
| H  | 7.57149400  | -2.63805400 | 0.60144600  |
| C  | 5.76115600  | -1.46086900 | 0.65873900  |
| H  | 5.35374400  | -1.90508800 | -0.25616100 |
| H  | 5.31759900  | -1.99498100 | 1.50305600  |
| N  | -3.92305400 | 0.14713800  | -0.66505400 |
| C  | -0.13275300 | -2.72549500 | 0.14131600  |
| H  | -0.44391000 | -3.12506700 | 1.09574400  |
| C  | 1.19481800  | -2.43894500 | -0.24672300 |
| H  | 2.07824900  | -2.59770200 | 0.35515500  |
| C  | 1.16676300  | -1.93102100 | -1.57147700 |
| H  | 2.02445200  | -1.62427900 | -2.15436200 |
| C  | -0.17923100 | -1.90478800 | -1.99846100 |
| H  | -0.53462500 | -1.57540000 | -2.96466000 |
| C  | -0.98240600 | -2.39592300 | -0.93877300 |
| H  | -2.05517700 | -2.52150400 | -0.96202600 |
| C  | -2.76183900 | 0.18657700  | -0.58190200 |
| C  | -5.35268800 | 0.05665000  | -0.65699500 |
| H  | -5.70689700 | 0.56635000  | -1.56022400 |
| C  | -5.91827400 | 0.77471400  | 0.58113000  |
| H  | -5.60494500 | 1.82188700  | 0.57114400  |
| H  | -5.48246600 | 0.31464500  | 1.47482900  |
| C  | -7.44773100 | 0.65601200  | 0.61776600  |
| H  | -7.82836400 | 1.14227400  | 1.52027000  |

|   |             |             |             |
|---|-------------|-------------|-------------|
| H | -7.87500900 | 1.20017700  | -0.23420700 |
| C | -7.90010300 | -0.80986600 | 0.56372800  |
| H | -8.99245900 | -0.86800100 | 0.55399000  |
| H | -7.56458800 | -1.32479000 | 1.47264000  |
| C | -7.32031500 | -1.52460100 | -0.66485900 |
| H | -7.74104600 | -1.08086800 | -1.57623000 |
| H | -7.61141800 | -2.57871300 | -0.66896400 |
| C | -5.79009900 | -1.41770400 | -0.70762000 |
| H | -5.35280000 | -1.93565200 | 0.15319000  |
| H | -5.38721100 | -1.88851800 | -1.60812800 |
